# Supplementary material
Source: PubMed Central journal article supplement (PMC6746589)
Supplement: NIHMS1535283-supplement-Supplemental_Publication_Material.pdf [file NIHMS1535283-supplement-Supplemental_Publication_Material.pdf]

## SUPPLEMENTAL MATERIAL

### Table of Contents:

Page 2: **Supplemental Figure 1.** Risk of death from cardiovascular disease (A) and cancer (B) per 10-point increase in plant-based diet index scores for preceding 8-, 12-, 16-year changes

Page 3: **Supplemental Figure 2.** Hazard Ratios (95% CIs) for associations between 12-year changes in quintiles of food group intake and the risk of death from any cause

Page 4: **Supplemental Figure 3.** Subgroup analyses between 12-year changes in plant-based diet indices and all-cause mortality per 10-point increase in each index score

Page 6: **Supplemental Table 1.** Examples of food items and criteria for scoring each plant-based diet indices (from the 1986 NHS food frequency questionnaire)

Page 9: **Supplemental Table 2.** Initial (1986) and 12-year changes in characteristics of participants according to quintiles of changes in healthful plant-based diet index (hPDI) and unhealthful plant-based diet index (uPDI)

Page 15: **Supplemental Table 3.** 12-year changes in plant-based diet indices and subtypes of CVD and cancer mortality risk per 10-point increase in plant-based diet indices

Page 17: **Supplemental Table 4.** Pooled initial (1986) and 12-year changes in servings of healthy plant foods, less healthy plant foods, and animal foods among quintiles of changes in plant-based diet indices

Page 28: **Supplemental Table 5.** Hazard Ratios (95% CIs) for the associations between 12-year changes in plant-based diet indices and risk of total, CVD, and cancer mortality per 10-point increase in each index score with further adjustment for mammogram screening and physical checkups

Page 30: **Supplemental Table 6.** 4-year lag analysis for 12-year changes in plant-based diet indices and risk of total mortality per 10-point increase in each index score

Page 31: **Supplemental Table 7.** 12-year changes in plant-based diet indices and risk of total mortality per 10-point increase in plant-based diet indices with excluding each food group

Page 35: **Supplemental Table 8.** 12-year changes in plant-based diet indices and risk of total mortality per 10-point increase in healthy plant-based diet score with positive coding for fish, poultry, fermented dairy, low-fat dairy, high-fat dairy, and egg

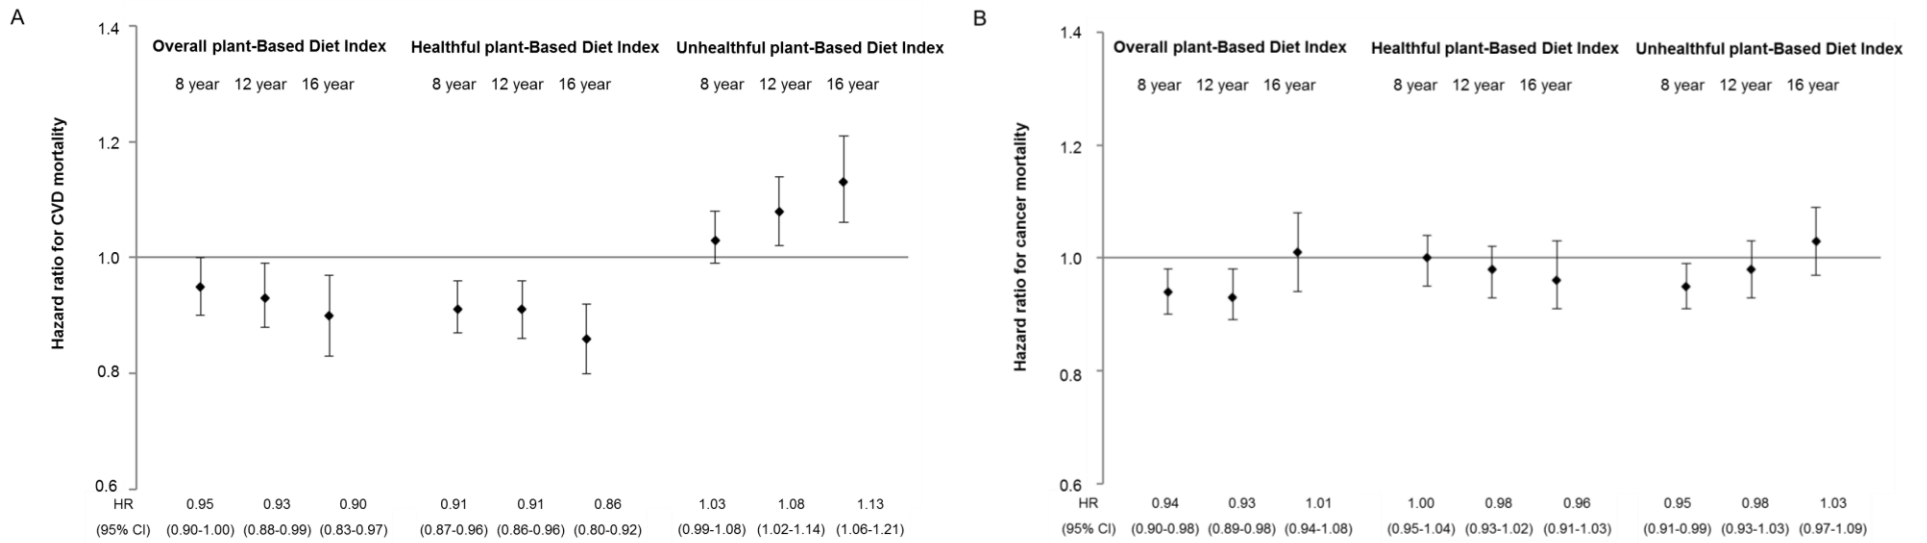

**Supplemental Figure 1. Risk of death from cardiovascular disease (A) and cancer (B) per 10-point increase in plant-based diet index scores for preceding 8-, 12-, 16-year changes.** The multivariable-adjusted hazard ratios were calculated with adjustments for age, sex, race, initial plant-based diet index score, family history of myocardial infarction, diabetes, or cancer, aspirin use, multivitamin use, initial body mass index, weight change, menopausal status and hormone use in women, smoking status, history of hypertension, hypercholesterolemia, or type 2 diabetes, antihypertensive medication use, cholesterol-lowering medication use, and initial and changes in each of smoking pack-years, physical activity, total energy intake, alcohol consumption, and margarine intake. Results from the Nurses' Health Study and the Health Professionals Follow-Up Study were combined with the use of the fixed effects model. Error bars represent 95% confidence intervals; and CVD, cardiovascular disease.

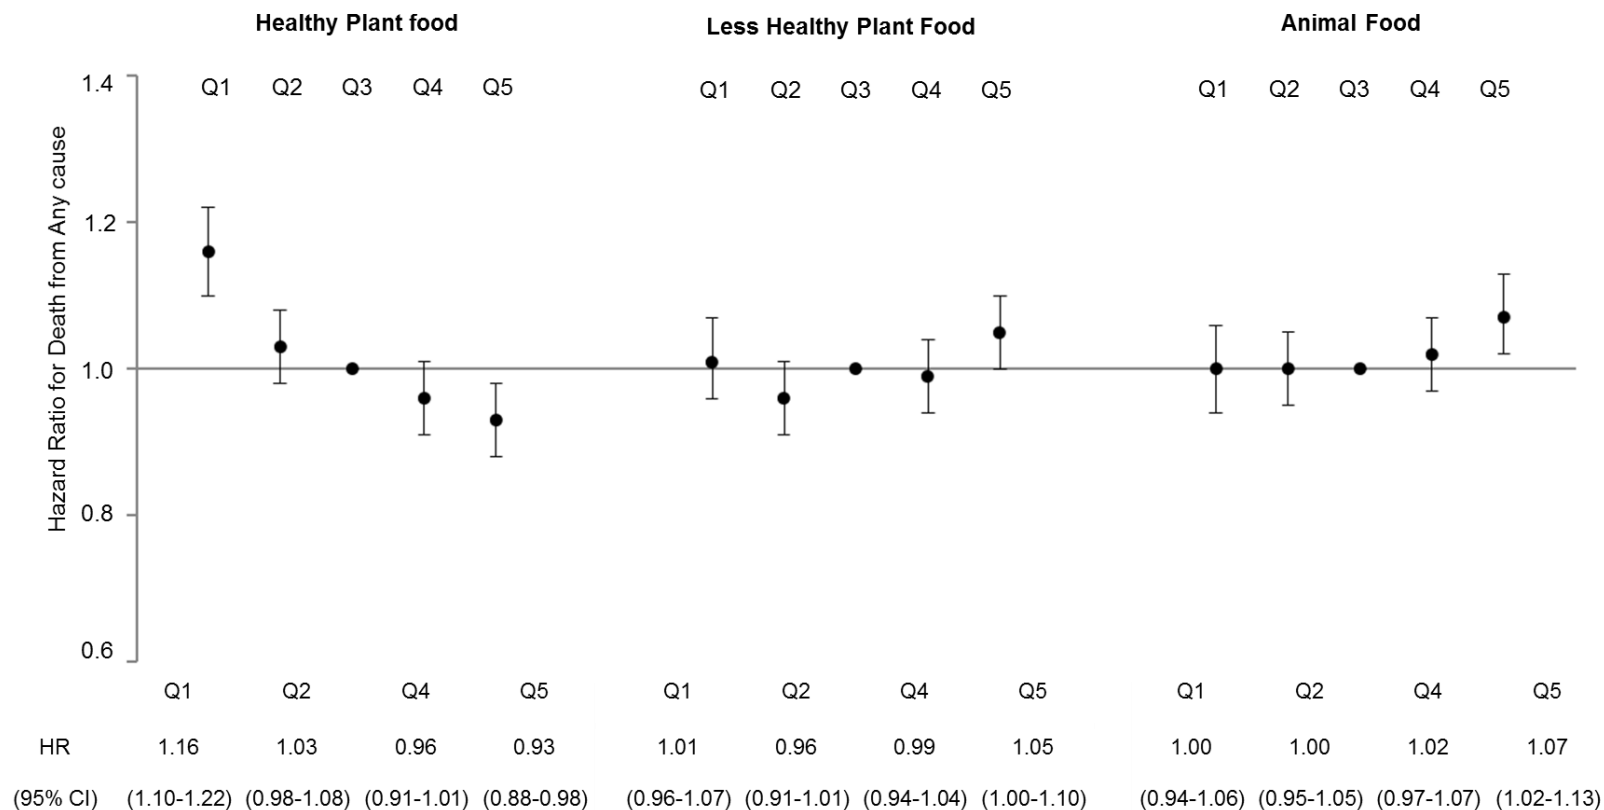

**Supplemental Figure 2. Hazard Ratios (95% CI) for associations between 12-year changes in quintiles of food group intake and the risk of death from any cause.** The multivariable-adjusted hazard ratios were calculated with adjustments for age, race, initial corresponding food group intake, family history of diabetes, myocardial infarction, or cancer, aspirin use, multivitamin use, initial body mass index, weight change, menopausal status and postmenopausal hormone use in women, smoking status, history of hypertension, hypercholesterolemia, or type 2 diabetes, antihypertensive medication use, cholesterol-lowering medication use, and initial and changes in each of smoking pack-years, physical activity, total energy intake, alcohol intake, margarine intake, and other food group intake. Results from the Nurses' Health Study and the Health Professionals Follow-Up Study were combined with the use of the fixed effects model. Error bars represent 95% confidence intervals; Q, quintile; HR, hazard ratio; and CI, confidence interval.

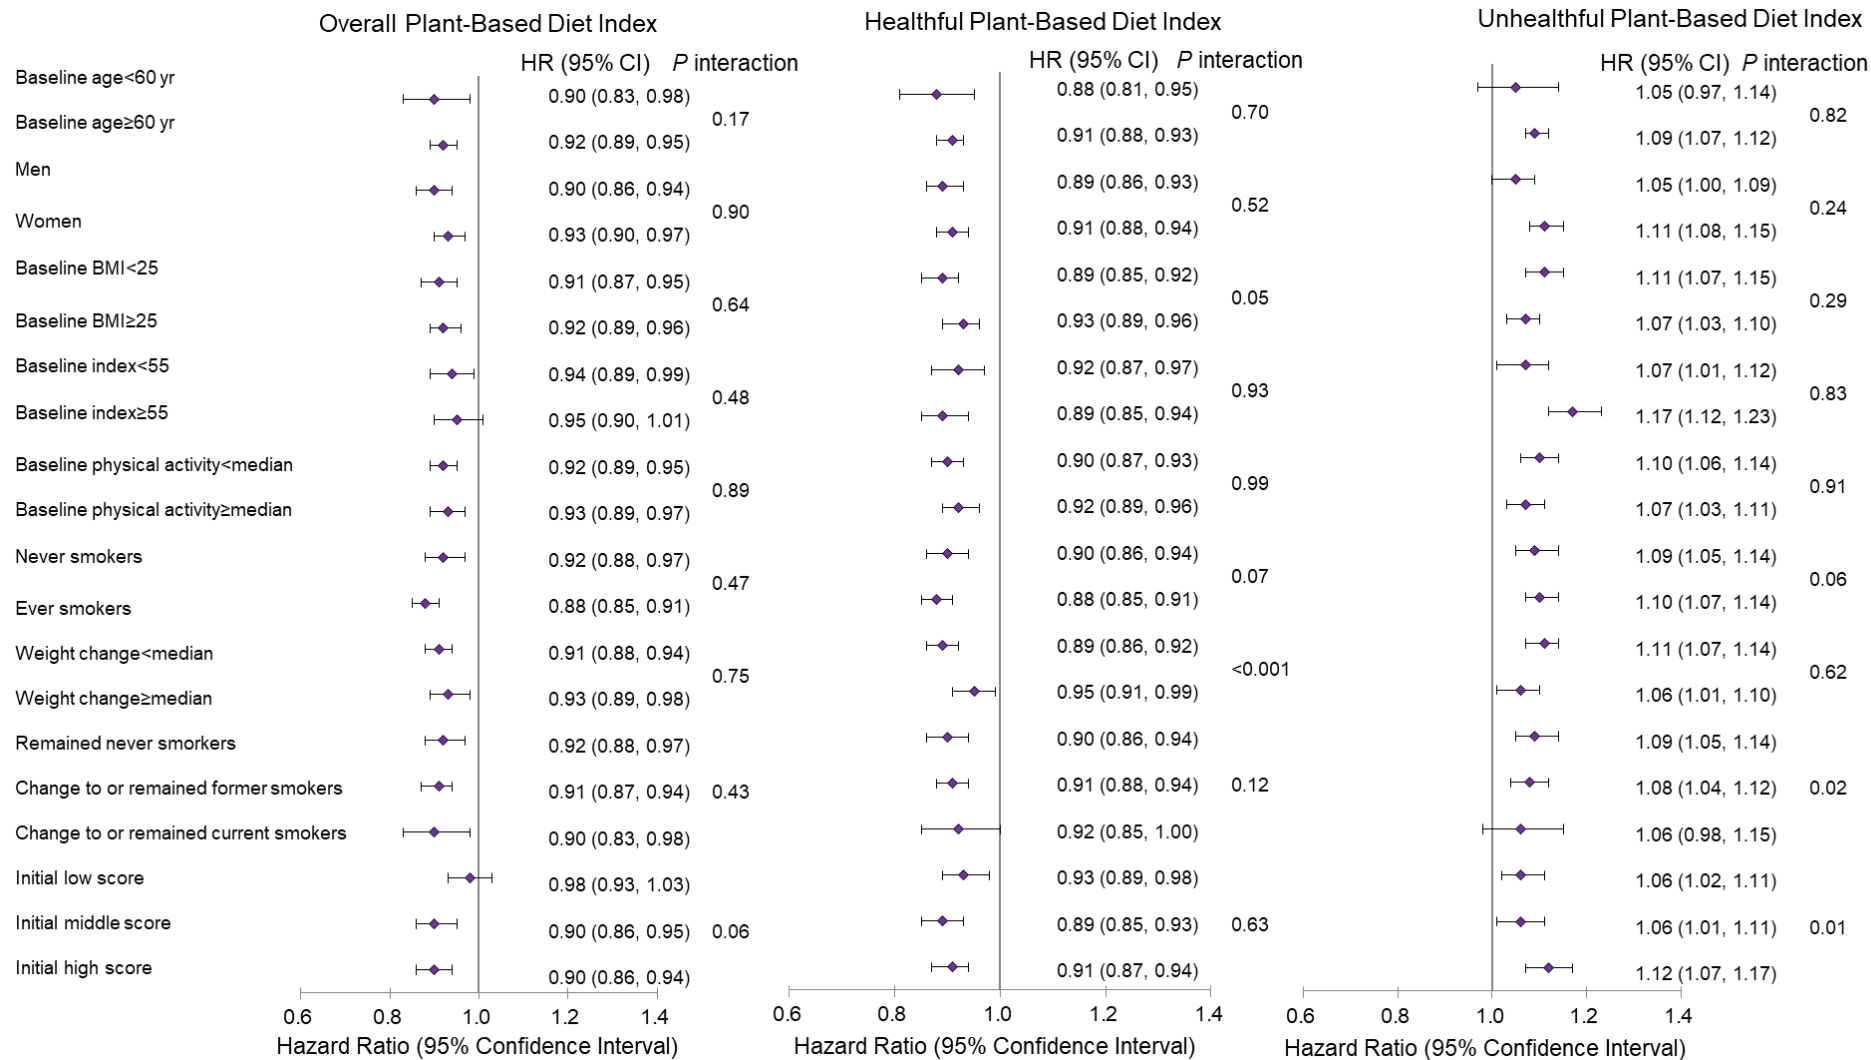

**Supplemental Figure 3. Subgroup analyses between 12-year changes in plant-based diet indices and all-cause mortality per 10-point increase in each index score.** The multivariable-adjusted hazard ratios were calculated with adjustments for age, race, initial plant-based diet index score, family history of myocardial infarction, diabetes, or cancer, aspirin use, multivitamin use, initial body mass index, weight change, menopausal status and hormone use in women, smoking status, history of hypertension, hypercholesterolemia, or type 2 diabetes, antihypertensive medication use, cholesterol-lowering medication use, and initial and changes in each of smoking pack-years, physical activity,

total energy intake, alcohol consumption, and margarine intake, except the stratification factor. Results for sex were obtained after combining the Nurses' Health Study and the Health Professionals Follow-Up Study. All other results were calculated by combining the results from the Nurses' Health Study and the Health Professionals Follow-Up Study with the use of the fixed effects model. Error bars represent 95% confidence intervals; HR, hazard ratio; CI, confidence interval.

**Supplemental Table 1. Examples of food items and criteria for scoring each plant-based diet indices (from the 1986 NHS food frequency questionnaire)**

|                                   |                                                                                                                                                                                                                                                                                                                                                                                                                                                                                                                                                                                                                                                                                                                                                                                   | <b>PDI</b>      | <b>hPDI</b>     | <b>uPDI</b>    |
|-----------------------------------|-----------------------------------------------------------------------------------------------------------------------------------------------------------------------------------------------------------------------------------------------------------------------------------------------------------------------------------------------------------------------------------------------------------------------------------------------------------------------------------------------------------------------------------------------------------------------------------------------------------------------------------------------------------------------------------------------------------------------------------------------------------------------------------|-----------------|-----------------|----------------|
| <b><i>Healthy plant foods</i></b> |                                                                                                                                                                                                                                                                                                                                                                                                                                                                                                                                                                                                                                                                                                                                                                                   |                 |                 |                |
| Whole grains                      | Whole grain breakfast cereal (1 cup), other cooked breakfast cereal (1 cup), cooked oatmeal (1 cup), dark bread (slice), brown rice (1 cup cooked), other grains (1 cup cooked), bran (1 tbs), wheat germ (1 tbs), popcorn (1 cup)                                                                                                                                                                                                                                                                                                                                                                                                                                                                                                                                                | Positive scores | Positive scores | Reverse scores |
| Fruits                            | Raisins or grapes (1 oz or small pack), prunes (5 or 1/2 cup), bananas (1), cantaloupe (1/4 melon), watermelon (1 slice), avocado (1/2 fruit), fresh apples (1), applesauce (1/2 cup), pears (1), oranges (1), grapefruit (1/2), strawberries (1/2 cup), blueberries (1/2 cup), peaches (1), apricots (1), plums (1)                                                                                                                                                                                                                                                                                                                                                                                                                                                              | Positive scores | Positive scores | Reverse scores |
| Vegetables                        | Tomatoes (1), tomato juice (small glass), tomato sauce (1/2 cup), red chili sauce (1 tbs), broccoli (1/2 cup), cauliflower (1/2 cup), cooked cabbage (1/2 cup), coleslaw or uncooked cabbage (1/2 cup), Brussels sprouts (1/2 cup), raw carrots (1/2 carrot), cooked carrots (1/2 cup), mixed vegetables (1/2 cup), yams or sweet potatoes (1/2 cup), yellow or winter squash (1/2 cup), eggplant or zucchini or other summer squash (1/2 cup), kale or mustard or chard greens (1/2 cup), cooked spinach (1/2 cup), raw spinach (1 serving), iceberg or head lettuce (serving), romaine or leaf lettuce (serving), green pepper (1/2 pepper), cucumber (1/4 cucumber), celery (4-inch stick), mushrooms (1), alfalfa sprouts (1/2 cup), corn (1 ear or 1/2 cup frozen or canned) | Positive scores | Positive scores | Reverse scores |
| Nuts                              | Nuts (small pack or 1 oz), peanut butter (1 tbs)                                                                                                                                                                                                                                                                                                                                                                                                                                                                                                                                                                                                                                                                                                                                  | Positive scores | Positive scores | Reverse scores |
| Legumes                           | String beans (1/2 cup), tofu or soybeans (3-4 oz), beans or lentils (1/2 cup), peas or lima beans (1/2 cup)                                                                                                                                                                                                                                                                                                                                                                                                                                                                                                                                                                                                                                                                       | Positive scores | Positive scores | Reverse scores |
| Vegetable oil                     | Vegetable oil (1 tbs), oil-based salad dressing (1 tbs)                                                                                                                                                                                                                                                                                                                                                                                                                                                                                                                                                                                                                                                                                                                           | Positive scores | Positive scores | Reverse scores |

| Tea and coffee                         | Tea (1 cup), coffee (1 cup), decaffeinated coffee or non-caffeinated tea (1 cup)                                                                                                                                                                                                                                                       | Positive scores | Positive scores | Reverse scores  |
|----------------------------------------|----------------------------------------------------------------------------------------------------------------------------------------------------------------------------------------------------------------------------------------------------------------------------------------------------------------------------------------|-----------------|-----------------|-----------------|
| <b><i>Less healthy plant foods</i></b> |                                                                                                                                                                                                                                                                                                                                        |                 |                 |                 |
| Fruit juices                           | Apple cider (nonalcoholic) or juice (small grass), orange juice (small grass), grapefruit juice (small grass), other fruit juice (small grass)                                                                                                                                                                                         | Positive scores | Reverse scores  | Positive scores |
| Refined grains                         | Refined grain breakfast cereal (1 cup), white bread (slice), English muffins or bagels or rolls (1), muffins or biscuits (1), white rice (1 cup cooked), pancakes or waffles (serving), crackers (4), pasta (1 cup cooked)                                                                                                             | Positive scores | Reverse scores  | Positive scores |
| Potatoes                               | French fries (4 oz), baked or boiled or mashed potatoes (1 for baked or boiled, 1 cup for mashed), potato or corn chips (small bag or 1 oz)                                                                                                                                                                                            | Positive scores | Reverse scores  | Positive scores |
| Sugar-sweetened beverages              | Soda with sugar (1 glass, bottle, or can), noncarbonated fruit drinks with sugar (1 glass, bottle, or can)                                                                                                                                                                                                                             | Positive scores | Reverse scores  | Positive scores |
| Sweets and desserts                    | Chocolates (1 oz), candy bars (1), candy without chocolate (1 oz), cookies (home-baked and ready-made) (1), brownies (1), doughnuts (1), cake (home-made and ready-made) (slice), sweet roll or coffee cake or other pastry (serving), pie (home-baked and ready-made) (slice), jams or jellies or preserves or syrup or honey (1 tbs) | Positive scores | Reverse scores  | Positive scores |
| <b><i>Animal foods</i></b>             |                                                                                                                                                                                                                                                                                                                                        |                 |                 |                 |
| Animal fat                             | Butter added to food (1 pat), butter or lard used for cooking (yes or no)                                                                                                                                                                                                                                                              | Reverse scores  | Reverse scores  | Reverse scores  |
| Dairy                                  | Skim low fat milk (8 oz glass), whole milk (8 oz glass), cream (1 tbs), sour cream (1 tbs), sherbet (1/2 cup), ice cream (1/2 cup), yogurt (1 cup), cottage or ricotta cheese (1/2 cup), cream cheese (1 oz), other cheese (1 slice or 1 oz)                                                                                           | Reverse scores  | Reverse scores  | Reverse scores  |
| Eggs                                   | Eggs (1)                                                                                                                                                                                                                                                                                                                               | Reverse scores  | Reverse scores  | Reverse scores  |

|                                  |                                                                                                                                                                                                                                                                                                                                                              |                |                |                |
|----------------------------------|--------------------------------------------------------------------------------------------------------------------------------------------------------------------------------------------------------------------------------------------------------------------------------------------------------------------------------------------------------------|----------------|----------------|----------------|
| Fish and seafood                 | Canned tuna (3-4 oz), dark meat fish (3-5 oz), other fish (3-5 oz), shrimp or lobster or scallops (as a main dish)                                                                                                                                                                                                                                           | Reverse scores | Reverse scores | Reverse scores |
| Meat                             | Chicken or turkey with skin (4-6 oz), chicken or turkey without skin (4-6 oz), bacon (2 slices), hot dogs (1), processed meats (piece or slice), hamburger (1 patty), beef, calf, or pork liver (4 oz), chicken or turkey liver (1 oz), beef or pork or lamb (as a mixed dish, e.g. stew, casserole, lasagne), beef or pork or lamb (as a main dish, 4-6 oz) | Reverse scores | Reverse scores | Reverse scores |
| Miscellaneous animal-based foods | Pizza (2 slices), chowder or cream soup (1 cup), mayonnaise or other creamy salad dressing (1 tbs)                                                                                                                                                                                                                                                           | Reverse scores | Reverse scores | Reverse scores |

---

Words in the parentheses showed serving sizes. Abbreviations: PDI, overall plant-based diet index; hPDI, healthful plant-based diet index, uPDI, unhealthful plant-based diet index; NHS, Nurses' Health Study; tbs, tablespoon.



**Supplemental Table 2. Initial (1986) and 12-year changes\* in characteristics of participants according to quintiles of changes in  
healthful plant-based diet index (hPDI) and unhealthy plant-based diet index (uPDI)**

|                                                | Nurses' Health Study |                   |                   | Health Professionals Follow-Up Study |                   |                   |
|------------------------------------------------|----------------------|-------------------|-------------------|--------------------------------------|-------------------|-------------------|
|                                                | Quintile 1           | Quintile 3        | Quintile 5        | Quintile 1                           | Quintile 3        | Quintile 5        |
| <b>Healthful plant-based diet index (hPDI)</b> |                      |                   |                   |                                      |                   |                   |
| No.                                            | 10,089               | 11,180            | 9,389             | 5,213                                | 5,878             | 4,686             |
| hPDI score                                     |                      |                   |                   |                                      |                   |                   |
| Initial                                        | 60.0 (56.0, 65.0)    | 55.0 (51.0, 60.0) | 50.0 (46.0, 55.0) | 60.0 (55.0, 64.0)                    | 54.0 (49.0, 58.0) | 49.0 (45.0, 54.0) |
| Change                                         | -10.0 (-12.0, -8.0)  | 0.0 (-1.0, 0.0)   | 9.0 (7.0, 11.0)   | -8.0 (-11.0, -7.0)                   | 1.0 (0.0, 1.0)    | 10.0 (8.0, 12.0)  |
| Age at 1998 (yr)                               | 66 (60, 71)          | 63 (58, 70)       | 62 (57, 68)       | 65 (57, 73)                          | 63 (56, 70)       | 61 (55, 68)       |
| Initial body-mass index <sup>†</sup>           | 24.2 (22.0, 27.4)    | 24.0 (21.9, 27.4) | 24.1 (21.8, 27.5) | 25.1 (23.3, 26.9)                    | 24.8 (23.2, 26.7) | 25.0 (23.3, 26.9) |
| Weight change (kg)                             | 4.5 (0.0, 9.1)       | 3.2 (0.0, 7.7)    | 2.3 (-0.9, 6.8)   | 2.7 (0.0, 6.8)                       | 2.3 (-0.5, 5.4)   | 1.4 (-1.8, 4.5)   |
| Physical activity (metabolic equivalents/wk)   |                      |                   |                   |                                      |                   |                   |
| Initial                                        | 7.5 (2.2, 20.0)      | 7.4 (2.0, 18.0)   | 6.7 (2.0, 17.0)   | 14.3 (4.9, 31.6)                     | 12.3 (4.1, 30.1)  | 12.3 (4.1, 29.3)  |
| Change                                         | 1.0 (-5.6, 10.0)     | 2.1 (-3.7, 11.5)  | 3.2 (-2.6, 13.7)  | 0.3 (-8.8, 13.2)                     | 1.6 (-6.2, 14.2)  | 1.8 (-6.2, 15.5)  |
| Alcohol intake (g/day)                         |                      |                   |                   |                                      |                   |                   |
| Initial                                        | 1.8 (0.0, 7.4)       | 1.8 (0.0, 7.6)    | 1.8 (0.0, 6.9)    | 6.0 (1.0, 15.4)                      | 6.3 (1.0, 15.3)   | 6.0 (1.0, 15.0)   |
| Change                                         | 0.0 (-1.8, 0.9)      | 0.0 (-1.8, 0.3)   | 0.0 (-2.0, 0.1)   | 0.0 (-2.7, 3.7)                      | 0.0 (-2.8, 2.9)   | 0.0 (-3.1, 2.7)   |
| Margarine Intake (servings/day)                |                      |                   |                   |                                      |                   |                   |
| Initial                                        | 0.4 (0.1, 1.0)       | 0.4 (0.1, 1.0)    | 0.4 (0.1, 1.0)    | 0.4 (0.0, 0.8)                       | 0.4 (0.0, 1.0)    | 0.4 (0.0, 1.0)    |

|                                                                  | Nurses' Health Study |                   |                   | Health Professionals Follow-Up Study |                   |                   |
|------------------------------------------------------------------|----------------------|-------------------|-------------------|--------------------------------------|-------------------|-------------------|
|                                                                  | Quintile 1           | Quintile 3        | Quintile 5        | Quintile 1                           | Quintile 3        | Quintile 5        |
| Change                                                           | 0.0 (-0.7, 0.0)      | -0.1 (-0.8, 0.0)  | -0.1 (-0.8, 0.0)  | 0.0 (-0.4, 0.1)                      | 0.0 (-0.4, 0.0)   | 0.0 (-0.4, 0.0)   |
| Initial Energy Intake (kcal/day)                                 | 1604 (1302, 1942)    | 1719 (1403, 2095) | 1835 (1500, 2202) | 1815 (1457, 2212)                    | 1945 (1579, 2393) | 2056 (1692, 2486) |
| White race (%) <sup>‡</sup>                                      | 98                   | 98                | 98                | 97                                   | 96                | 96                |
| Smoking status (%)                                               |                      |                   |                   |                                      |                   |                   |
| Remained a never smoker                                          | 44                   | 47                | 47                | 45                                   | 49                | 47                |
| Change from current to former, or remained former smoker         | 45                   | 43                | 44                | 45                                   | 42                | 45                |
| Change from never or past to current, or remained current smoker | 11                   | 10                | 8                 | 5                                    | 5                 | 4                 |
| Smoking history among ever smokers (no. of pack-yr) <sup>§</sup> |                      |                   |                   |                                      |                   |                   |
| Initial                                                          | 18.0 (6.0, 32.0)     | 16.0 (6.0, 31.0)  | 16.0 (6.0, 31.0)  | 18.0 (10.0, 30.0)                    | 20.0 (10.0, 30.0) | 18.0 (10.0, 30.0) |
| Change                                                           | 0.0 (0.0, 4.0)       | 0.0 (0.0, 4.0)    | 0.0 (0.0, 3.0)    | 0.0 (0.0, 0.0)                       | 0.0 (0.0, 0.0)    | 0.0 (0.0, 0.0)    |
| Past diagnoses (%)                                               |                      |                   |                   |                                      |                   |                   |
| Hypertension                                                     | 44                   | 43                | 43                | 37                                   | 34                | 34                |
| High cholesterol                                                 | 56                   | 56                | 60                | 47                                   | 46                | 49                |
| Diabetes                                                         | 5                    | 6                 | 9                 | 5                                    | 6                 | 8                 |
| Current use of medication or supplements (%)                     |                      |                   |                   |                                      |                   |                   |

|                                                  | Nurses' Health Study |                   |                   | Health Professionals Follow-Up Study |                   |                   |
|--------------------------------------------------|----------------------|-------------------|-------------------|--------------------------------------|-------------------|-------------------|
|                                                  | Quintile 1           | Quintile 3        | Quintile 5        | Quintile 1                           | Quintile 3        | Quintile 5        |
| Aspirin                                          | 54                   | 54                | 54                | 63                                   | 66                | 64                |
| Multivitamin                                     | 62                   | 62                | 62                | 61                                   | 60                | 60                |
| Antihypertensive medication                      | 37                   | 36                | 35                | 28                                   | 27                | 25                |
| Cholesterol-lowering medication                  | 15                   | 14                | 16                | 15                                   | 13                | 14                |
| Family history (%)                               |                      |                   |                   |                                      |                   |                   |
| Diabetes                                         | 30                   | 29                | 30                | 22                                   | 23                | 23                |
| Myocardial infarction                            | 26                   | 26                | 25                | 16                                   | 16                | 15                |
| Cancer                                           | 59                   | 59                | 59                | 38                                   | 37                | 38                |
| <b>Unhealthful plant-based diet index (uPDI)</b> |                      |                   |                   |                                      |                   |                   |
| No.                                              | 9,388                | 10,198            | 10,220            | 4,699                                | 5,914             | 5,188             |
| uPDI score                                       |                      |                   |                   |                                      |                   |                   |
| Initial                                          | 59.0 (55.0, 64.0)    | 54.0 (50.0, 59.0) | 49.0 (45.0, 54.0) | 57.0 (52.0, 61.0)                    | 55.0 (51.0, 60.0) | 50.0 (46.0, 54.0) |
| Change                                           | -10.0 (-12.0, -8.0)  | 0.0 (-1.0, 1.0)   | 10.0 (8.0, 13.0)  | -10.0(-12.0, -8.0)                   | 0.0 (-1.0, 1.0)   | 9.0 (7.0, 11.0)   |
| Age at 1998 (yr)                                 | 61 (56, 66)          | 63 (58, 70)       | 68 (61, 72)       | 62 (55, 69)                          | 63 (56, 70)       | 64 (56, 72)       |
| Initial body-mass index <sup>†</sup>             | 24.0 (21.8, 27.4)    | 24.0 (21.9, 27.3) | 24.3 (22.1, 27.4) | 25.0 (23.3, 26.9)                    | 25.0 (23.2, 26.8) | 25.1 (23.4, 26.9) |
| Weight change (kg)                               | 2.7 (-0.9, 6.8)      | 3.6 (0.0, 7.7)    | 3.6 (0.0, 8.6)    | 1.8 (-0.9, 5.0)                      | 2.3 (-0.5, 5.4)   | 2.3 (-0.5, 5.9)   |
| Physical activity (metabolic equivalents/wk)     |                      |                   |                   |                                      |                   |                   |
| Initial                                          | 7.4 (2.0, 17.5)      | 7.5 (2.0, 18.6)   | 7.5 (2.2, 18.8)   | 12.1 (4.0, 29.9)                     | 13.0 (4.4, 29.9)  | 13.9 (4.4, 30.8)  |

|                                                                  | Nurses' Health Study |                   |                   | Health Professionals Follow-Up Study |                   |                   |
|------------------------------------------------------------------|----------------------|-------------------|-------------------|--------------------------------------|-------------------|-------------------|
|                                                                  | Quintile 1           | Quintile 3        | Quintile 5        | Quintile 1                           | Quintile 3        | Quintile 5        |
| Change                                                           | 3.5 (-2.9, 14.4)     | 2.0 (-3.7, 11.3)  | 0.9 (-5.6, 9.7)   | 1.9 (-6.1, 15.6)                     | 1.2 (-6.8, 14.5)  | 0.4 (-8.7, 12.7)  |
| Alcohol intake (g/day)                                           |                      |                   |                   |                                      |                   |                   |
| Initial                                                          | 1.8 (0.0, 7.6)       | 1.9 (0.0, 7.8)    | 1.8 (0.0, 6.9)    | 5.8 (0.9, 14.8)                      | 6.0 (1.0, 15.0)   | 6.0 (1.0, 15.9)   |
| Change                                                           | 0.0 (-1.7, 0.9)      | 0.0 (-1.9, 0.6)   | 0.0 (-2.0, 0.0)   | 0.0 (-2.4, 3.9)                      | 0.0 (-2.7, 3.0)   | 0.0 (-3.3, 2.6)   |
| Margarine Intake (servings/day)                                  |                      |                   |                   |                                      |                   |                   |
| Initial                                                          | 0.8 (0.1, 1.0)       | 0.4 (0.1, 1.0)    | 0.4 (0.1, 1.0)    | 0.4 (0.0, 0.8)                       | 0.4 (0.0, 0.8)    | 0.4 (0.0, 1.0)    |
| Change                                                           | -0.1 (-0.8, 0.0)     | -0.1 (-0.7, 0.0)  | -0.1 (-0.7, 0.0)  | 0.0 (-0.4, 0.0)                      | 0.0 (-0.4, 0.0)   | 0.0 (-0.4, 0.0)   |
| Initial Energy Intake (kcal/day)                                 | 1617 (1313, 1966)    | 1725 (1402, 2105) | 1798 (1481, 2155) | 1837 (1471, 2255)                    | 1952 (1567, 2383) | 2018 (1650, 2448) |
| White race (%) <sup>‡</sup>                                      | 98                   | 98                | 98                | 96                                   | 96                | 97                |
| Smoking status (%)                                               |                      |                   |                   |                                      |                   |                   |
| Remained a never smoker                                          | 45                   | 46                | 46                | 48                                   | 48                | 46                |
| Change from current to former, or remained former smoker         | 46                   | 44                | 43                | 43                                   | 42                | 45                |
| Change from never or past to current, or remained current smoker | 9                    | 10                | 11                | 5                                    | 5                 | 4                 |
| Smoking history among ever smokers (no. of pack-yr) <sup>§</sup> |                      |                   |                   |                                      |                   |                   |
| Initial                                                          | 17.0 (6.0, 32.0)     | 17.0 (6.0, 31.0)  | 17.0 (6.0, 32.0)  | 19.0 (10.0, 30.0)                    | 19.0 (10.0, 31.0) | 20.0 (10.0, 31.0) |

|                                              | Nurses' Health Study |                |                | Health Professionals Follow-Up Study |                |                |
|----------------------------------------------|----------------------|----------------|----------------|--------------------------------------|----------------|----------------|
|                                              | Quintile 1           | Quintile 3     | Quintile 5     | Quintile 1                           | Quintile 3     | Quintile 5     |
| Change                                       | 0.0 (0.0, 3.0)       | 0.0 (0.0, 3.0) | 0.0 (0.0, 4.0) | 0.0 (0.0, 0.0)                       | 0.0 (0.0, 0.0) | 0.0 (0.0, 0.0) |
| Past diagnoses (%)                           |                      |                |                |                                      |                |                |
| Hypertension (%)                             | 44                   | 42             | 44             | 36                                   | 33             | 35             |
| High cholesterol (%)                         | 57                   | 56             | 58             | 47                                   | 46             | 48             |
| Diabetes (%)                                 | 10                   | 6              | 5              | 9                                    | 5              | 5              |
| Current use of medication or supplements (%) |                      |                |                |                                      |                |                |
| Aspirin                                      | 55                   | 55             | 52             | 66                                   | 66             | 63             |
| Multivitamin                                 | 64                   | 61             | 60             | 62                                   | 59             | 58             |
| Antihypertensive medication                  | 36                   | 36             | 36             | 27                                   | 26             | 27             |
| Cholesterol-lowering medication              | 15                   | 15             | 15             | 13                                   | 14             | 14             |
| Family history (%)                           |                      |                |                |                                      |                |                |
| Diabetes                                     | 30                   | 29             | 30             | 24                                   | 22             | 23             |
| Myocardial infarction                        | 26                   | 25             | 25             | 16                                   | 15             | 16             |
| Cancer                                       | 59                   | 58             | 59             | 38                                   | 38             | 37             |

\* The initial of the study was setup at 1986, and the baseline was setup at 1998; the change means 12-year difference between 1986 and 1998; values are medians (25th and 75th percentiles) for continuous variables and percentages for categorical variables. All variables except age were age standardized to the age distribution of the study population. †The body-mass index was calculated as weight in kilograms divided by the

square of the height in meters. †Race was reported by the participants. §A pack-year was defined as the equivalent of smoking one pack of cigarettes (20 cigarettes) per day for one year.

**Supplemental Table 3. 12-year changes in plant-based diet indices and subtypes of CVD and cancer mortality risk per 10-point**

**increase in plant-based diet indices**

|                               | Nurses' Health Study |                   |                   | Health Professionals Follow-Up Study |                   |                   |
|-------------------------------|----------------------|-------------------|-------------------|--------------------------------------|-------------------|-------------------|
|                               | PDI                  | hPDI              | uPDI              | PDI                                  | hPDI              | uPDI              |
| <b>Coronary heart disease</b> |                      |                   |                   |                                      |                   |                   |
| Cases/person-years            |                      | 1,394/725,316     |                   |                                      | 1,539/371,322     |                   |
| MV model                      | 0.93 (0.84, 1.02)    | 0.88 (0.81, 0.97) | 1.12 (1.03, 1.22) | 0.89 (0.81, 0.98)                    | 0.87 (0.80, 0.95) | 1.09 (0.99, 1.19) |
| <b>Stroke</b>                 |                      |                   |                   |                                      |                   |                   |
| Cases/person-years            |                      | 652/725,316       |                   |                                      | 333/371,322       |                   |
| MV model                      | 0.99 (0.86, 1.15)    | 0.99 (0.87, 1.13) | 1.04 (0.92, 1.18) | 1.01 (0.82, 1.23)                    | 1.04 (0.86, 1.26) | 0.90 (0.74, 1.08) |
| <b>Lung cancer</b>            |                      |                   |                   |                                      |                   |                   |
| Cases/person-years            |                      | 797/725,316       |                   |                                      | 343/371,322       |                   |
| MV model                      | 0.97 (0.85, 1.10)    | 1.11 (0.98, 1.24) | 0.87 (0.78, 0.98) | 0.77 (0.62, 0.94)                    | 0.78 (0.64, 0.94) | 1.14 (0.93, 1.38) |
| <b>Colon cancer</b>           |                      |                   |                   |                                      |                   |                   |
| Cases/person-years            |                      | 218/725,316       |                   |                                      | 156/371,322       |                   |
| MV model                      | 1.15 (0.90, 1.47)    | 1.17 (0.93, 1.46) | 0.99 (0.79, 1.22) | 0.77 (0.57, 1.03)                    | 1.02 (0.77, 1.34) | 0.90 (0.68, 1.18) |
| <b>Breast cancer</b>          |                      |                   |                   |                                      |                   |                   |
| Cases/person-years            |                      | 262/725,316       |                   |                                      |                   |                   |
| MV model                      | 1.11 (0.89, 1.39)    | 1.03 (0.84, 1.27) | 1.03 (0.85, 1.25) |                                      |                   |                   |
| <b>Prostate cancer</b>        |                      |                   |                   |                                      |                   |                   |
| Cases/person-years            |                      |                   |                   |                                      | 175/371,322       |                   |

---

Abbreviations: CVD, cardiovascular disease; PDI, plant-based diet index; hPDI, healthful plant-based diet index; uPDI, unhealthful plant-based diet index; MV model, multivariable-adjusted model. The MV model was adjusted for age, race, family history of myocardial infarction, diabetes, or cancer, aspirin use, multivitamin use, initial body mass index, weight change, menopausal status and hormone use in women, smoking status, history of hypertension, hypercholesterolemia, or type 2 diabetes, antihypertensive medication use, cholesterol-lowering medication use, and initial and changes in each of smoking pack-years, physical activity, total energy intake, alcohol consumption, and margarine intake. Due to the small numbers of cases, the initial BMI was categorized as <23, 23-24.9, 25-29.9, ≥30 and the smoking status was categorized as never-never, current-past, never/past-current, past-past, and current-current in the analyses on stroke, lung cancer, and prostate cancer in the Health Professionals Follow-Up Study.



**Supplemental Table 4. Pooled initial (1986) and 12-year changes in servings of healthy plant foods, less healthy plant foods, and animal foods among quintiles of changes in plant-based diet indices**

|                                             | Quintile 1        | Quintile 2        | Quintile 3      | Quintile 4     | Quintile 5     | Beta coefficients<br>(95% CI) |
|---------------------------------------------|-------------------|-------------------|-----------------|----------------|----------------|-------------------------------|
| <b>Overall plant-based diet index (PDI)</b> |                   |                   |                 |                |                |                               |
| No.                                         | 16,378            | 12,850            | 16,399          | 15,009         | 14,678         |                               |
| Median (range)                              | -9 (-20, -6)      | -4 (-5, -2)       | 0 (-2, 1)       | 3 (2, 5)       | 8 (6, 18)      |                               |
| <b>Healthy plant foods (servings/day)</b>   |                   |                   |                 |                |                |                               |
| Whole grains                                |                   |                   |                 |                |                |                               |
| Initial                                     | 1.5 (1.5, 1.5)    | 1.4 (1.4, 1.4)    | 1.4 (1.3, 1.4)  | 1.3 (1.3, 1.3) | 1.3 (1.3, 1.3) |                               |
| Change                                      | -0.1 (-0.1, -0.1) | 0.0 (0.0, 0.0)    | 0.1 (0.1, 0.1)  | 0.2 (0.1, 0.2) | 0.3 (0.3, 0.3) | 0.2 (0.2, 0.2)                |
| Fruits                                      |                   |                   |                 |                |                |                               |
| Initial                                     | 1.9 (1.8, 1.9)    | 1.7 (1.7, 1.8)    | 1.7 (1.7, 1.7)  | 1.6 (1.6, 1.7) | 1.6 (1.5, 1.6) |                               |
| Change                                      | -0.2 (-0.2, -0.2) | -0.1 (-0.1, -0.1) | 0.0 (0.0, 0.0)  | 0.1 (0.1, 0.1) | 0.2 (0.2, 0.3) | 0.2 (0.2, 0.3)                |
| Vegetables                                  |                   |                   |                 |                |                |                               |
| Initial                                     | 3.7 (3.7, 3.7)    | 3.5 (3.4, 3.5)    | 3.3 (3.3, 3.3)  | 3.3 (3.2, 3.3) | 3.1 (3.1, 3.2) |                               |
| Change                                      | 0.0 (0.0, 0.1)    | 0.2 (0.2, 0.2)    | 0.3 (0.3, 0.4)  | 0.5 (0.5, 0.5) | 0.9 (0.8, 0.9) | 0.4 (0.4, 0.5)                |
| Nuts                                        |                   |                   |                 |                |                |                               |
| Initial                                     | 0.4 (0.4, 0.4)    | 0.4 (0.4, 0.4)    | 0.4 (0.4, 0.4)  | 0.4 (0.4, 0.4) | 0.4 (0.3, 0.4) |                               |
| Change                                      | -0.1 (-0.1, -0.1) | -0.1 (-0.1, -0.1) | 0.0 (-0.1, 0.0) | 0.0 (0.0, 0.0) | 0.0 (0.0, 0.0) | 0.0 (0.0, 0.1)                |
| Legumes                                     |                   |                   |                 |                |                |                               |
| Initial                                     | 0.5 (0.5, 0.5)    | 0.4 (0.4, 0.4)    | 0.4 (0.4, 0.4)  | 0.4 (0.4, 0.4) | 0.3 (0.3, 0.4) |                               |

|                                                       |                   |                   |                   |                   |                   |                |
|-------------------------------------------------------|-------------------|-------------------|-------------------|-------------------|-------------------|----------------|
| Change                                                | -0.1 (-0.1, -0.1) | 0.0 (0.0, 0.0)    | 0.0 (0.0, 0.0)    | 0.0 (0.0, 0.0)    | 0.1 (0.1, 0.1)    | 0.1 (0.1, 0.1) |
| Vegetable oil                                         |                   |                   |                   |                   |                   |                |
| Initial                                               | 0.3 (0.3, 0.3)    | 0.3 (0.3, 0.3)    | 0.3 (0.3, 0.3)    | 0.2 (0.2, 0.2)    | 0.2 (0.2, 0.2)    |                |
| Change                                                | 0.0 (-0.1, 0.0)   | 0.0 (0.0, 0.0)    | 0.0 (0.0, 0.0)    | 0.0 (0.0, 0.1)    | 0.1 (0.1, 0.1)    | 0.1 (0.1, 0.1) |
| Tea and coffee                                        |                   |                   |                   |                   |                   |                |
| Initial                                               | 3.0 (3.0, 3.0)    | 2.9 (2.8, 2.9)    | 2.8 (2.7, 2.8)    | 2.7 (2.7, 2.7)    | 2.6 (2.5, 2.6)    |                |
| Change                                                | -0.7 (-0.7, -0.7) | -0.5 (-0.5, -0.5) | -0.4 (-0.4, -0.4) | -0.3 (-0.3, -0.3) | -0.1 (-0.1, -0.1) | 0.3 (0.3, 0.3) |
| <b><i>Less healthy plant foods (servings/day)</i></b> |                   |                   |                   |                   |                   |                |
| Fruit juices                                          |                   |                   |                   |                   |                   |                |
| Initial                                               | 0.8 (0.8, 0.9)    | 0.8 (0.8, 0.8)    | 0.8 (0.8, 0.8)    | 0.7 (0.7, 0.7)    | 0.7 (0.7, 0.7)    |                |
| Change                                                | -0.1 (-0.1, -0.1) | 0.0 (0.0, 0.0)    | 0.1 (0.0, 0.1)    | 0.1 (0.1, 0.1)    | 0.2 (0.2, 0.2)    | 0.1 (0.1, 0.2) |
| Refined grains                                        |                   |                   |                   |                   |                   |                |
| Initial                                               | 1.7 (1.6, 1.7)    | 1.6 (1.6, 1.6)    | 1.5 (1.5, 1.6)    | 1.5 (1.5, 1.5)    | 1.4 (1.4, 1.4)    |                |
| Change                                                | 0.0 (0.0, 0.0)    | 0.1 (0.1, 0.2)    | 0.2 (0.2, 0.2)    | 0.2 (0.2, 0.2)    | 0.3 (0.3, 0.3)    | 0.1 (0.1, 0.2) |
| Potatoes                                              |                   |                   |                   |                   |                   |                |
| Initial                                               | 0.6 (0.6, 0.6)    | 0.6 (0.5, 0.6)    | 0.5 (0.5, 0.5)    | 0.5 (0.5, 0.5)    | 0.5 (0.5, 0.5)    |                |
| Change                                                | -0.1 (-0.1, -0.1) | -0.1 (-0.1, 0.0)  | 0.0 (0.0, 0.0)    | 0.0 (0.0, 0.0)    | 0.0 (0.0, 0.0)    | 0.1 (0.1, 0.1) |
| Sugar-sweetened beverages                             |                   |                   |                   |                   |                   |                |
| Initial                                               | 0.3 (0.3, 0.3)    | 0.3 (0.3, 0.3)    | 0.3 (0.3, 0.3)    | 0.3 (0.3, 0.3)    | 0.2 (0.2, 0.2)    |                |
| Change                                                | 0.0 (0.0, 0.0)    | 0.0 (0.0, 0.0)    | 0.0 (0.0, 0.1)    | 0.1 (0.1, 0.1)    | 0.1 (0.1, 0.1)    | 0.0 (0.0, 0.1) |
| Sweets and desserts                                   |                   |                   |                   |                   |                   |                |

|                                           |                |                   |                   |                   |                   |                   |
|-------------------------------------------|----------------|-------------------|-------------------|-------------------|-------------------|-------------------|
| Initial                                   | 1.3 (1.3, 1.3) | 1.3 (1.2, 1.3)    | 1.3 (1.2, 1.3)    | 1.2 (1.2, 1.2)    | 1.1 (1.1, 1.1)    |                   |
| Change                                    | 0.0 (0.0, 0.0) | 0.1 (0.1, 0.1)    | 0.2 (0.1, 0.2)    | 0.2 (0.2, 0.2)    | 0.3 (0.3, 0.3)    | 0.2 (0.1, 0.2)    |
| <b><i>Animal foods (servings/day)</i></b> |                |                   |                   |                   |                   |                   |
| Animal fat                                |                |                   |                   |                   |                   |                   |
| Initial                                   | 0.2 (0.2, 0.3) | 0.3 (0.3, 0.3)    | 0.3 (0.3, 0.3)    | 0.3 (0.3, 0.4)    | 0.4 (0.4, 0.4)    |                   |
| Change                                    | 0.1 (0.1, 0.1) | 0.0 (0.0, 0.0)    | 0.0 (0.0, 0.0)    | 0.0 (-0.1, 0.0)   | -0.1 (-0.1, -0.1) | -0.1 (-0.1, -0.1) |
| Dairy                                     |                |                   |                   |                   |                   |                   |
| Initial                                   | 1.8 (1.8, 1.8) | 2.0 (2.0, 2.0)    | 2.1 (2.1, 2.1)    | 2.2 (2.2, 2.2)    | 2.4 (2.4, 2.4)    |                   |
| Change                                    | 0.3 (0.3, 0.3) | 0.1 (0.0, 0.1)    | -0.1 (-0.1, -0.1) | -0.2 (-0.3, -0.2) | -0.5 (-0.5, -0.5) | -0.4 (-0.4, -0.4) |
| Eggs                                      |                |                   |                   |                   |                   |                   |
| Initial                                   | 0.2 (0.2, 0.2) | 0.3 (0.3, 0.3)    | 0.3 (0.3, 0.3)    | 0.3 (0.3, 0.3)    | 0.4 (0.4, 0.4)    |                   |
| Change                                    | 0.0 (0.0, 0.0) | 0.0 (0.0, 0.0)    | -0.1 (-0.1, -0.1) | -0.1 (-0.1, -0.1) | -0.1 (-0.1, -0.1) | -0.1 (-0.1, -0.1) |
| Fish and seafood                          |                |                   |                   |                   |                   |                   |
| Initial                                   | 0.3 (0.3, 0.3) | 0.3 (0.3, 0.4)    | 0.3 (0.3, 0.4)    | 0.4 (0.4, 0.4)    | 0.4 (0.4, 0.4)    |                   |
| Change                                    | 0.0 (0.0, 0.0) | -0.1 (-0.1, -0.1) | -0.1 (-0.1, -0.1) | -0.1 (-0.1, -0.1) | -0.1 (-0.1, -0.1) | 0.0 (-0.1, 0.0)   |
| Meat                                      |                |                   |                   |                   |                   |                   |
| Initial                                   | 1.2 (1.2, 1.2) | 1.2 (1.2, 1.3)    | 1.3 (1.3, 1.3)    | 1.3 (1.3, 1.3)    | 1.4 (1.4, 1.4)    |                   |
| Change                                    | 0.1 (0.1, 0.1) | 0.0 (-0.1, 0.0)   | -0.1 (-0.1, -0.1) | -0.2 (-0.2, -0.2) | -0.3 (-0.3, -0.3) | -0.2 (-0.2, -0.2) |
| Miscellaneous animal-based foods          |                |                   |                   |                   |                   |                   |
| Initial                                   | 0.3 (0.3, 0.3) | 0.4 (0.4, 0.4)    | 0.4 (0.4, 0.4)    | 0.4 (0.4, 0.4)    | 0.5 (0.5, 0.5)    |                   |
| Change                                    | 0.0 (0.0, 0.0) | 0.0 (0.0, 0.0)    | 0.0 (0.0, 0.0)    | -0.1 (-0.1, -0.1) | -0.1 (-0.1, -0.1) | -0.1 (-0.1, -0.1) |

**Food groups (servings/day)**

## Healthy plant foods

|         |                   |                   |                   |                 |                |                |
|---------|-------------------|-------------------|-------------------|-----------------|----------------|----------------|
| Initial | 11.2 (11.2, 11.3) | 10.6 (10.5, 10.7) | 10.2 (10.1, 10.2) | 9.9 (9.9, 10.0) | 9.5 (9.4, 9.6) |                |
| Change  | -1.3 (-1.3, -1.2) | -0.5 (-0.6, -0.5) | 0.0 (-0.1, 0.0)   | 0.6 (0.5, 0.6)  | 1.7 (1.6, 1.7) | 1.6 (1.6, 1.6) |

## Less healthy plant foods

|         |                   |                |                |                |                |                |
|---------|-------------------|----------------|----------------|----------------|----------------|----------------|
| Initial | 4.7 (4.7, 4.7)    | 4.4 (4.4, 4.5) | 4.4 (4.4, 4.4) | 4.2 (4.1, 4.2) | 3.9 (3.9, 3.9) |                |
| Change  | -0.2 (-0.2, -0.2) | 0.2 (0.2, 0.2) | 0.4 (0.4, 0.4) | 0.6 (0.6, 0.6) | 0.9 (0.8, 0.9) | 0.6 (0.6, 0.6) |

## Animal foods

|         |                |                 |                   |                   |                   |                   |
|---------|----------------|-----------------|-------------------|-------------------|-------------------|-------------------|
| Initial | 4.1 (4.1, 4.2) | 4.5 (4.5, 4.6)  | 4.7 (4.7, 4.8)    | 5.0 (5.0, 5.0)    | 5.4 (5.4, 5.4)    |                   |
| Change  | 0.6 (0.5, 0.6) | 0.0 (-0.1, 0.0) | -0.4 (-0.4, -0.4) | -0.7 (-0.7, -0.7) | -1.3 (-1.4, -1.3) | -1.0 (-1.1, -1.0) |

**Healthful plant-based diet index (hPDI)**

|                |              |             |           |          |           |  |
|----------------|--------------|-------------|-----------|----------|-----------|--|
| No.            | 15,302       | 14,607      | 17,058    | 14,272   | 14,075    |  |
| Median (range) | -9 (-20, -6) | -4 (-6, -2) | 0 (-2, 2) | 4 (2, 6) | 9 (6, 19) |  |

**Healthy plant foods (servings/day)**

## Whole grains

|         |                   |                   |                |                |                |                |
|---------|-------------------|-------------------|----------------|----------------|----------------|----------------|
| Initial | 1.7 (1.7, 1.7)    | 1.5 (1.5, 1.5)    | 1.4 (1.3, 1.4) | 1.3 (1.2, 1.3) | 1.1 (1.1, 1.1) |                |
| Change  | -0.3 (-0.3, -0.3) | -0.1 (-0.1, -0.1) | 0.1 (0.1, 0.1) | 0.2 (0.2, 0.3) | 0.5 (0.5, 0.5) | 0.4 (0.4, 0.4) |

## Fruits

|         |                   |                   |                |                |                |                |
|---------|-------------------|-------------------|----------------|----------------|----------------|----------------|
| Initial | 2.0 (2.0, 2.0)    | 1.8 (1.8, 1.8)    | 1.7 (1.6, 1.7) | 1.6 (1.5, 1.6) | 1.4 (1.4, 1.5) |                |
| Change  | -0.4 (-0.4, -0.4) | -0.2 (-0.2, -0.1) | 0.0 (0.0, 0.0) | 0.2 (0.1, 0.2) | 0.4 (0.4, 0.5) | 0.4 (0.4, 0.4) |

## Vegetables

|                                                       |                   |                   |                   |                   |                   |                   |
|-------------------------------------------------------|-------------------|-------------------|-------------------|-------------------|-------------------|-------------------|
| Initial                                               | 3.8 (3.8, 3.8)    | 3.5 (3.5, 3.6)    | 3.3 (3.3, 3.4)    | 3.2 (3.2, 3.2)    | 3.0 (2.9, 3.0)    |                   |
| Change                                                | -0.3 (-0.3, -0.3) | 0.1 (0.1, 0.2)    | 0.4 (0.3, 0.4)    | 0.6 (0.6, 0.7)    | 1.1 (1.1, 1.1)    | 0.7 (0.7, 0.7)    |
| Nuts                                                  |                   |                   |                   |                   |                   |                   |
| Initial                                               | 0.5 (0.5, 0.5)    | 0.4 (0.4, 0.4)    | 0.4 (0.4, 0.4)    | 0.4 (0.4, 0.4)    | 0.3 (0.3, 0.3)    |                   |
| Change                                                | -0.2 (-0.2, -0.2) | -0.1 (-0.1, -0.1) | 0.0 (-0.1, 0.0)   | 0.0 (0.0, 0.0)    | 0.1 (0.1, 0.1)    | 0.1 (0.1, 0.1)    |
| Legumes                                               |                   |                   |                   |                   |                   |                   |
| Initial                                               | 0.5 (0.5, 0.5)    | 0.4 (0.4, 0.4)    | 0.4 (0.4, 0.4)    | 0.4 (0.4, 0.4)    | 0.3 (0.3, 0.3)    |                   |
| Change                                                | -0.1 (-0.1, -0.1) | 0.0 (0.0, 0.0)    | 0.0 (0.0, 0.0)    | 0.0 (0.0, 0.0)    | 0.1 (0.1, 0.1)    | 0.1 (0.1, 0.1)    |
| Vegetable oil                                         |                   |                   |                   |                   |                   |                   |
| Initial                                               | 0.3 (0.3, 0.3)    | 0.3 (0.3, 0.3)    | 0.3 (0.3, 0.3)    | 0.2 (0.2, 0.2)    | 0.2 (0.2, 0.2)    |                   |
| Change                                                | -0.1 (-0.1, -0.1) | 0.0 (0.0, 0.0)    | 0.0 (0.0, 0.0)    | 0.1 (0.1, 0.1)    | 0.2 (0.2, 0.2)    | 0.1 (0.1, 0.1)    |
| Tea and coffee                                        |                   |                   |                   |                   |                   |                   |
| Initial                                               | 3.0 (3.0, 3.0)    | 2.9 (2.8, 2.9)    | 2.8 (2.7, 2.8)    | 2.7 (2.7, 2.7)    | 2.6 (2.5, 2.6)    |                   |
| Change                                                | -0.7 (-0.7, -0.7) | -0.5 (-0.5, -0.5) | -0.4 (-0.4, -0.4) | -0.3 (-0.3, -0.2) | 0.0 (-0.1, 0.0)   | 0.3 (0.3, 0.4)    |
| <b><i>Less healthy plant foods (servings/day)</i></b> |                   |                   |                   |                   |                   |                   |
| Fruit juices                                          |                   |                   |                   |                   |                   |                   |
| Initial                                               | 0.7 (0.7, 0.7)    | 0.7 (0.7, 0.8)    | 0.8 (0.7, 0.8)    | 0.8 (0.8, 0.8)    | 0.8 (0.8, 0.8)    |                   |
| Change                                                | 0.2 (0.1, 0.2)    | 0.1 (0.1, 0.1)    | 0.1 (0.0, 0.1)    | 0.0 (0.0, 0.0)    | -0.1 (-0.1, -0.1) | -0.1 (-0.1, -0.1) |
| Refined grains                                        |                   |                   |                   |                   |                   |                   |
| Initial                                               | 1.3 (1.3, 1.4)    | 1.5 (1.4, 1.5)    | 1.5 (1.5, 1.5)    | 1.6 (1.6, 1.6)    | 1.7 (1.7, 1.8)    |                   |
| Change                                                | 0.4 (0.4, 0.4)    | 0.2 (0.2, 0.3)    | 0.1 (0.1, 0.2)    | 0.1 (0.0, 0.1)    | 0.0 (-0.1, 0.0)   | -0.2 (-0.2, -0.2) |

|                                           |                |                 |                   |                   |                   |                   |
|-------------------------------------------|----------------|-----------------|-------------------|-------------------|-------------------|-------------------|
| Potatoes                                  |                |                 |                   |                   |                   |                   |
| Initial                                   | 0.5 (0.5, 0.5) | 0.5 (0.5, 0.5)  | 0.5 (0.5, 0.5)    | 0.6 (0.5, 0.6)    | 0.6 (0.6, 0.6)    |                   |
| Change                                    | 0.0 (0.0, 0.0) | 0.0 (0.0, 0.0)  | 0.0 (0.0, 0.0)    | -0.1 (-0.1, -0.1) | -0.1 (-0.1, -0.1) | -0.1 (-0.1, -0.1) |
| Sugar-sweetened beverages                 |                |                 |                   |                   |                   |                   |
| Initial                                   | 0.2 (0.2, 0.2) | 0.3 (0.2, 0.3)  | 0.3 (0.3, 0.3)    | 0.3 (0.3, 0.3)    | 0.3 (0.3, 0.3)    |                   |
| Change                                    | 0.1 (0.1, 0.1) | 0.1 (0.1, 0.1)  | 0.0 (0.0, 0.1)    | 0.0 (0.0, 0.0)    | -0.1 (-0.1, -0.1) | -0.1 (-0.1, -0.1) |
| Sweets and desserts                       |                |                 |                   |                   |                   |                   |
| Initial                                   | 1.1 (1.1, 1.1) | 1.2 (1.2, 1.2)  | 1.2 (1.2, 1.3)    | 1.3 (1.2, 1.3)    | 1.3 (1.3, 1.3)    |                   |
| Change                                    | 0.3 (0.3, 0.3) | 0.2 (0.2, 0.2)  | 0.2 (0.1, 0.2)    | 0.1 (0.1, 0.1)    | 0.0 (0.0, 0.0)    | -0.2 (-0.2, -0.2) |
| <b><i>Animal foods (servings/day)</i></b> |                |                 |                   |                   |                   |                   |
| Animal fat                                |                |                 |                   |                   |                   |                   |
| Initial                                   | 0.2 (0.2, 0.2) | 0.3 (0.3, 0.3)  | 0.3 (0.3, 0.3)    | 0.4 (0.3, 0.4)    | 0.4 (0.4, 0.4)    |                   |
| Change                                    | 0.1 (0.1, 0.1) | 0.0 (0.0, 0.0)  | 0.0 (0.0, 0.0)    | -0.1 (-0.1, 0.0)  | -0.1 (-0.1, -0.1) | -0.1 (-0.1, -0.1) |
| Dairy                                     |                |                 |                   |                   |                   |                   |
| Initial                                   | 2.0 (2.0, 2.0) | 2.0 (2.0, 2.1)  | 2.1 (2.1, 2.1)    | 2.1 (2.1, 2.1)    | 2.2 (2.2, 2.2)    |                   |
| Change                                    | 0.0 (0.0, 0.0) | 0.0 (-0.1, 0.0) | -0.1 (-0.1, -0.1) | -0.1 (-0.1, -0.1) | -0.2 (-0.2, -0.2) | -0.1 (-0.1, -0.1) |
| Eggs                                      |                |                 |                   |                   |                   |                   |
| Initial                                   | 0.3 (0.2, 0.3) | 0.3 (0.3, 0.3)  | 0.3 (0.3, 0.3)    | 0.3 (0.3, 0.3)    | 0.4 (0.4, 0.4)    |                   |
| Change                                    | 0.0 (0.0, 0.0) | 0.0 (0.0, 0.0)  | -0.1 (-0.1, -0.1) | -0.1 (-0.1, -0.1) | -0.1 (-0.1, -0.1) | -0.1 (-0.1, 0.0)  |
| Fish and seafood                          |                |                 |                   |                   |                   |                   |
| Initial                                   | 0.4 (0.4, 0.4) | 0.4 (0.4, 0.4)  | 0.3 (0.3, 0.4)    | 0.3 (0.3, 0.4)    | 0.4 (0.4, 0.4)    |                   |

|                                  |                   |                   |                   |                   |                   |                   |
|----------------------------------|-------------------|-------------------|-------------------|-------------------|-------------------|-------------------|
| Change                           | -0.1 (-0.1, -0.1) | -0.1 (-0.1, -0.1) | -0.1 (-0.1, -0.1) | -0.1 (-0.1, -0.1) | -0.1 (-0.1, -0.1) | 0.0 (0.0, 0.0)    |
| Meat                             |                   |                   |                   |                   |                   |                   |
| Initial                          | 1.2 (1.2, 1.2)    | 1.2 (1.2, 1.3)    | 1.3 (1.3, 1.3)    | 1.3 (1.3, 1.3)    | 1.3 (1.3, 1.3)    |                   |
| Change                           | 0.0 (0.0, 0.0)    | -0.1 (-0.1, -0.1) | -0.1 (-0.1, -0.1) | -0.2 (-0.2, -0.1) | -0.2 (-0.2, -0.2) | -0.1 (-0.1, -0.1) |
| Miscellaneous animal-based foods |                   |                   |                   |                   |                   |                   |
| Initial                          | 0.4 (0.3, 0.4)    | 0.4 (0.4, 0.4)    | 0.4 (0.4, 0.4)    | 0.4 (0.4, 0.4)    | 0.4 (0.4, 0.5)    |                   |
| Change                           | 0.0 (0.0, 0.0)    | 0.0 (0.0, 0.0)    | 0.0 (0.0, 0.0)    | -0.1 (-0.1, -0.1) | -0.1 (-0.1, -0.1) | -0.1 (-0.1, -0.1) |

**Food groups (servings/day)**

Healthy plant foods

|         |                   |                   |                   |                |                |                |
|---------|-------------------|-------------------|-------------------|----------------|----------------|----------------|
| Initial | 11.8 (11.7, 11.9) | 10.8 (10.8, 10.9) | 10.2 (10.1, 10.2) | 9.7 (9.6, 9.7) | 8.9 (8.9, 9.0) |                |
| Change  | -2.3 (-2.3, -2.2) | -0.8 (-0.9, -0.8) | 0.0 (0.0, 0.1)    | 1.0 (1.0, 1.0) | 2.6 (2.6, 2.7) | 2.5 (2.5, 2.5) |

Less healthy plant foods

|         |                |                |                |                |                   |                   |
|---------|----------------|----------------|----------------|----------------|-------------------|-------------------|
| Initial | 3.9 (3.8, 3.9) | 4.2 (4.1, 4.2) | 4.3 (4.3, 4.4) | 4.5 (4.5, 4.5) | 4.8 (4.7, 4.8)    |                   |
| Change  | 1.0 (1.0, 1.1) | 0.6 (0.6, 0.6) | 0.4 (0.3, 0.4) | 0.1 (0.0, 0.1) | -0.4 (-0.4, -0.3) | -0.7 (-0.7, -0.7) |

Animal foods

|         |                |                   |                   |                   |                   |                   |
|---------|----------------|-------------------|-------------------|-------------------|-------------------|-------------------|
| Initial | 4.4 (4.4, 4.4) | 4.6 (4.6, 4.6)    | 4.8 (4.7, 4.8)    | 4.9 (4.9, 4.9)    | 5.1 (5.1, 5.2)    |                   |
| Change  | 0.1 (0.1, 0.1) | -0.2 (-0.2, -0.2) | -0.4 (-0.4, -0.4) | -0.6 (-0.6, -0.5) | -0.9 (-0.9, -0.9) | -0.5 (-0.5, -0.5) |

---

**Unhealthy plant-based diet index (uPDI)**

|        |               |             |           |          |           |  |
|--------|---------------|-------------|-----------|----------|-----------|--|
| No.    | 14,087        | 16,157      | 16,112    | 13,550   | 15,408    |  |
| Median | -10 (-20, -7) | -4 (-6, -2) | 0 (-2, 2) | 4 (2, 6) | 9 (6, 21) |  |

---

**Healthy plant foods (servings/day)**

Whole grains

|         |                |                |                |                |                   |                   |
|---------|----------------|----------------|----------------|----------------|-------------------|-------------------|
| Initial | 1.2 (1.2, 1.2) | 1.3 (1.3, 1.3) | 1.4 (1.3, 1.4) | 1.5 (1.4, 1.5) | 1.6 (1.6, 1.6)    |                   |
| Change  | 0.3 (0.3, 0.3) | 0.2 (0.2, 0.2) | 0.1 (0.1, 0.1) | 0.0 (0.0, 0.0) | -0.2 (-0.2, -0.1) | -0.2 (-0.2, -0.2) |

Fruits

|         |                |                |                |                   |                   |                   |
|---------|----------------|----------------|----------------|-------------------|-------------------|-------------------|
| Initial | 1.5 (1.5, 1.5) | 1.6 (1.6, 1.6) | 1.7 (1.7, 1.7) | 1.8 (1.7, 1.8)    | 1.9 (1.9, 1.9)    |                   |
| Change  | 0.3 (0.3, 0.3) | 0.1 (0.1, 0.1) | 0.0 (0.0, 0.0) | -0.1 (-0.1, -0.1) | -0.3 (-0.3, -0.2) | -0.3 (-0.3, -0.2) |

Vegetables

|         |                |                |                |                |                   |                   |
|---------|----------------|----------------|----------------|----------------|-------------------|-------------------|
| Initial | 3.0 (3.0, 3.0) | 3.2 (3.2, 3.2) | 3.3 (3.3, 3.4) | 3.5 (3.5, 3.6) | 3.8 (3.8, 3.9)    |                   |
| Change  | 1.1 (1.1, 1.1) | 0.6 (0.6, 0.7) | 0.4 (0.3, 0.4) | 0.1 (0.1, 0.1) | -0.3 (-0.3, -0.3) | -0.7 (-0.7, -0.7) |

Nuts

|         |                |                |                  |                   |                   |                   |
|---------|----------------|----------------|------------------|-------------------|-------------------|-------------------|
| Initial | 0.4 (0.3, 0.4) | 0.4 (0.4, 0.4) | 0.4 (0.4, 0.4)   | 0.4 (0.4, 0.4)    | 0.4 (0.4, 0.5)    |                   |
| Change  | 0.0 (0.0, 0.0) | 0.0 (0.0, 0.0) | -0.1 (-0.1, 0.0) | -0.1 (-0.1, -0.1) | -0.1 (-0.1, -0.1) | -0.1 (-0.1, -0.1) |

Legumes

|         |                |                |                |                |                   |                   |
|---------|----------------|----------------|----------------|----------------|-------------------|-------------------|
| Initial | 0.4 (0.4, 0.4) | 0.4 (0.4, 0.4) | 0.4 (0.4, 0.4) | 0.4 (0.4, 0.4) | 0.5 (0.5, 0.5)    |                   |
| Change  | 0.1 (0.1, 0.1) | 0.0 (0.0, 0.0) | 0.0 (0.0, 0.0) | 0.0 (0.0, 0.0) | -0.1 (-0.1, -0.1) | -0.1 (-0.1, -0.1) |

Vegetable oil

|         |                |                |                |                |                   |                   |
|---------|----------------|----------------|----------------|----------------|-------------------|-------------------|
| Initial | 0.2 (0.2, 0.2) | 0.2 (0.2, 0.2) | 0.3 (0.3, 0.3) | 0.3 (0.3, 0.3) | 0.3 (0.3, 0.3)    |                   |
| Change  | 0.1 (0.1, 0.2) | 0.1 (0.1, 0.1) | 0.0 (0.0, 0.0) | 0.0 (0.0, 0.0) | -0.1 (-0.1, -0.1) | -0.1 (-0.1, -0.1) |

Tea and coffee

|         |                 |                   |                   |                   |                   |                   |
|---------|-----------------|-------------------|-------------------|-------------------|-------------------|-------------------|
| Initial | 2.5 (2.5, 2.6)  | 2.7 (2.6, 2.7)    | 2.8 (2.8, 2.8)    | 2.9 (2.8, 2.9)    | 3.1 (3.0, 3.1)    |                   |
| Change  | 0.0 (-0.1, 0.0) | -0.3 (-0.3, -0.3) | -0.4 (-0.4, -0.4) | -0.5 (-0.5, -0.5) | -0.7 (-0.7, -0.7) | -0.3 (-0.3, -0.3) |



**Less healthy plant foods (servings/day)**

## Fruit juices

|         |                   |                |                |                |                |                |
|---------|-------------------|----------------|----------------|----------------|----------------|----------------|
| Initial | 0.9 (0.9, 0.9)    | 0.8 (0.8, 0.8) | 0.8 (0.8, 0.8) | 0.7 (0.7, 0.7) | 0.7 (0.6, 0.7) |                |
| Change  | -0.2 (-0.2, -0.1) | 0.0 (0.0, 0.0) | 0.1 (0.0, 0.1) | 0.1 (0.1, 0.1) | 0.2 (0.2, 0.2) | 0.2 (0.2, 0.2) |

## Refined grains

|         |                   |                |                |                |                |                |
|---------|-------------------|----------------|----------------|----------------|----------------|----------------|
| Initial | 1.7 (1.7, 1.8)    | 1.6 (1.6, 1.6) | 1.5 (1.5, 1.6) | 1.4 (1.4, 1.5) | 1.3 (1.3, 1.3) |                |
| Change  | -0.2 (-0.2, -0.2) | 0.0 (0.0, 0.0) | 0.2 (0.1, 0.2) | 0.3 (0.3, 0.3) | 0.5 (0.5, 0.6) | 0.4 (0.4, 0.4) |

## Potatoes

|         |                   |                   |                |                |                |                |
|---------|-------------------|-------------------|----------------|----------------|----------------|----------------|
| Initial | 0.6 (0.6, 0.6)    | 0.6 (0.6, 0.6)    | 0.5 (0.5, 0.5) | 0.5 (0.5, 0.5) | 0.5 (0.4, 0.5) |                |
| Change  | -0.1 (-0.1, -0.1) | -0.1 (-0.1, -0.1) | 0.0 (0.0, 0.0) | 0.0 (0.0, 0.0) | 0.0 (0.0, 0.0) | 0.1 (0.1, 0.1) |

## Sugar-sweetened beverages

|         |                   |                |                |                |                |                |
|---------|-------------------|----------------|----------------|----------------|----------------|----------------|
| Initial | 0.4 (0.4, 0.4)    | 0.3 (0.3, 0.3) | 0.3 (0.3, 0.3) | 0.2 (0.2, 0.2) | 0.2 (0.2, 0.2) |                |
| Change  | -0.1 (-0.1, -0.1) | 0.0 (0.0, 0.0) | 0.0 (0.0, 0.1) | 0.1 (0.1, 0.1) | 0.2 (0.2, 0.2) | 0.2 (0.2, 0.2) |

## Sweets and desserts

|         |                   |                |                |                |                |                |
|---------|-------------------|----------------|----------------|----------------|----------------|----------------|
| Initial | 1.4 (1.4, 1.4)    | 1.3 (1.3, 1.3) | 1.2 (1.2, 1.3) | 1.2 (1.1, 1.2) | 1.0 (1.0, 1.0) |                |
| Change  | -0.2 (-0.2, -0.2) | 0.0 (0.0, 0.0) | 0.2 (0.1, 0.2) | 0.3 (0.3, 0.3) | 0.5 (0.5, 0.5) | 0.3 (0.3, 0.3) |

**Animal foods (servings/day)**

## Animal fat

|         |                |                |                |                 |                   |                   |
|---------|----------------|----------------|----------------|-----------------|-------------------|-------------------|
| Initial | 0.3 (0.3, 0.3) | 0.3 (0.3, 0.3) | 0.3 (0.3, 0.3) | 0.3 (0.3, 0.3)  | 0.3 (0.3, 0.4)    |                   |
| Change  | 0.1 (0.1, 0.1) | 0.0 (0.0, 0.0) | 0.0 (0.0, 0.0) | 0.0 (-0.1, 0.0) | -0.1 (-0.1, -0.1) | -0.1 (-0.1, -0.1) |

## Dairy

|                                   |                   |                   |                   |                   |                   |                   |
|-----------------------------------|-------------------|-------------------|-------------------|-------------------|-------------------|-------------------|
| Initial                           | 1.9 (1.9, 2.0)    | 2.0 (2.0, 2.1)    | 2.1 (2.1, 2.1)    | 2.1 (2.1, 2.2)    | 2.3 (2.2, 2.3)    |                   |
| Change                            | 0.1 (0.1, 0.2)    | 0.0 (0.0, 0.0)    | -0.1 (-0.1, -0.1) | -0.2 (-0.2, -0.2) | -0.3 (-0.3, -0.3) | -0.2 (-0.2, -0.2) |
| Eggs                              |                   |                   |                   |                   |                   |                   |
| Initial                           | 0.3 (0.3, 0.3)    | 0.3 (0.3, 0.3)    | 0.3 (0.3, 0.3)    | 0.3 (0.3, 0.3)    | 0.3 (0.3, 0.4)    |                   |
| Change                            | 0.0 (0.0, 0.0)    | 0.0 (0.0, 0.0)    | -0.1 (-0.1, -0.1) | -0.1 (-0.1, -0.1) | -0.1 (-0.1, -0.1) | -0.1 (-0.1, -0.1) |
| Fish and seafood                  |                   |                   |                   |                   |                   |                   |
| Initial                           | 0.3 (0.3, 0.3)    | 0.3 (0.3, 0.3)    | 0.4 (0.3, 0.4)    | 0.4 (0.4, 0.4)    | 0.4 (0.4, 0.4)    |                   |
| Change                            | 0.0 (0.0, 0.0)    | 0.0 (-0.1, 0.0)   | -0.1 (-0.1, -0.1) | -0.1 (-0.1, -0.1) | -0.1 (-0.1, -0.1) | -0.1 (-0.1, -0.1) |
| Meat                              |                   |                   |                   |                   |                   |                   |
| Initial                           | 1.2 (1.2, 1.2)    | 1.2 (1.2, 1.3)    | 1.3 (1.3, 1.3)    | 1.3 (1.3, 1.3)    | 1.3 (1.3, 1.3)    |                   |
| Change                            | 0.0 (0.0, 0.0)    | -0.1 (-0.1, -0.1) | -0.1 (-0.1, -0.1) | -0.2 (-0.2, -0.1) | -0.2 (-0.2, -0.2) | -0.1 (-0.1, -0.1) |
| Miscellaneous animal-based foods  |                   |                   |                   |                   |                   |                   |
| Initial                           | 0.4 (0.4, 0.4)    | 0.4 (0.4, 0.4)    | 0.4 (0.4, 0.4)    | 0.4 (0.4, 0.4)    | 0.4 (0.4, 0.5)    |                   |
| Change                            | 0.0 (0.0, 0.0)    | 0.0 (0.0, 0.0)    | 0.0 (0.0, 0.0)    | -0.1 (-0.1, -0.1) | -0.1 (-0.1, -0.1) | -0.1 (-0.1, -0.1) |
| <b>Food groups (servings/day)</b> |                   |                   |                   |                   |                   |                   |
| Healthy plant foods               |                   |                   |                   |                   |                   |                   |
| Initial                           | 9.1 (9.1, 9.2)    | 9.8 (9.7, 9.8)    | 10.2 (10.2, 10.3) | 10.7 (10.7, 10.8) | 11.7 (11.6, 11.7) |                   |
| Change                            | 2.1 (2.1, 2.2)    | 0.8 (0.7, 0.8)    | 0.0 (0.0, 0.1)    | -0.7 (-0.7, -0.7) | -1.9 (-1.9, -1.8) | -1.9 (-2.0, -1.9) |
| Less healthy plant foods          |                   |                   |                   |                   |                   |                   |
| Initial                           | 4.9 (4.9, 5.0)    | 4.6 (4.6, 4.6)    | 4.3 (4.3, 4.4)    | 4.1 (4.0, 4.1)    | 3.6 (3.6, 3.7)    |                   |
| Change                            | -0.9 (-0.9, -0.9) | -0.1 (-0.1, -0.1) | 0.4 (0.4, 0.4)    | 0.8 (0.8, 0.9)    | 1.6 (1.5, 1.6)    | 1.2 (1.2, 1.2)    |

Animal foods

|         |                |                   |                   |                   |                   |                   |
|---------|----------------|-------------------|-------------------|-------------------|-------------------|-------------------|
| Initial | 4.4 (4.3, 4.4) | 4.6 (4.6, 4.6)    | 4.8 (4.7, 4.8)    | 4.9 (4.8, 4.9)    | 5.1 (5.1, 5.2)    |                   |
| Change  | 0.3 (0.3, 0.3) | -0.2 (-0.2, -0.2) | -0.4 (-0.4, -0.4) | -0.6 (-0.7, -0.6) | -1.0 (-1.0, -0.9) | -0.6 (-0.6, -0.6) |

---

Abbreviation: CI, confidence interval. The least squares mean (95% CIs) initial (1986) and changes (1986 to 1998) in food intakes among quintiles of changes in plant-based diet indices were from the general linear model adjusted for age, sex, and initial and changes in total energy intake. Changes in food intakes were further adjusted for initial corresponding food intakes. Results were obtained after combining the Nurses' Health Study and the Health Professionals Follow-Up Study. Food group intakes were expressed as servings/day.

**Supplemental Table 5. Hazard ratios (95% CIs) for the associations between 12-year changes in plant-based diet indices and risk of total, CVD, and cancer mortality per 10-point increase in each index score with further adjustment for mammogram screening and physical checkups**

|                                                                                         | 10-point increase in PDI | 10-point increase in hPDI | 10-point increase in uPDI |
|-----------------------------------------------------------------------------------------|--------------------------|---------------------------|---------------------------|
| <b>Total Mortality</b>                                                                  |                          |                           |                           |
| <b>Nurses' Health Study</b>                                                             |                          |                           |                           |
| Cases/person-years                                                                      | 10,686/725,316           | 10,686/725,316            | 10,686/725,316            |
| Multivariable-adjusted model                                                            | 0.93 (0.90, 0.97)        | 0.91 (0.88, 0.94)         | 1.11 (1.08, 1.15)         |
| Multivariable-adjusted model + adjustment for mammogram screening and physical checkups | 0.93 (0.90, 0.97)        | 0.91 (0.88, 0.94)         | 1.11 (1.08, 1.15)         |
| <b>Health Professionals Follow-Up study</b>                                             |                          |                           |                           |
| Cases/person-years                                                                      | 6,490/371,322            | 6,490/371,322             | 6,490/371,322             |
| Multivariable-adjusted model                                                            | 0.90 (0.86, 0.94)        | 0.89 (0.86, 0.93)         | 1.05 (1.00, 1.09)         |
| Multivariable-adjusted model + adjustment for physical checkups                         | 0.90 (0.86, 0.94)        | 0.89 (0.86, 0.93)         | 1.05 (1.00, 1.09)         |
| <b>CVD Mortality</b>                                                                    |                          |                           |                           |
| <b>Nurses' Health Study</b>                                                             |                          |                           |                           |
| Cases/person-years                                                                      | 2,046/725,316            | 2,046/725,316             | 2,046/725,316             |
| Multivariable-adjusted model                                                            | 0.95 (0.87, 1.03)        | 0.92 (0.85, 0.99)         | 1.10 (1.02, 1.18)         |
| Multivariable-adjusted model + adjustment for mammogram screening and physical checkups | 0.95 (0.87, 1.03)        | 0.92 (0.85, 0.99)         | 1.10 (1.02, 1.18)         |
| <b>Health Professionals Follow-Up study</b>                                             |                          |                           |                           |
| Cases/person-years                                                                      | 1,872/371,322            | 1,872/371,322             | 1,872/371,322             |

|                                                                                         |                   |                   |                   |
|-----------------------------------------------------------------------------------------|-------------------|-------------------|-------------------|
| Multivariable-adjusted model                                                            | 0.91 (0.83, 0.99) | 0.90 (0.83, 0.98) | 1.05 (0.97, 1.14) |
| Multivariable-adjusted model + adjustment for physical checkups                         | 0.91 (0.83, 0.99) | 0.90 (0.83, 0.98) | 1.05 (0.97, 1.14) |
| <b>Cancer Mortality</b>                                                                 |                   |                   |                   |
| <b>Nurses' Health Study</b>                                                             |                   |                   |                   |
| Cases/person-years                                                                      | 3,091/725,316     | 3,091/725,316     | 3,091/725,316     |
| Multivariable-adjusted model                                                            | 0.96 (0.90, 1.03) | 1.01 (0.95, 1.07) | 0.97 (0.92, 1.03) |
| Multivariable-adjusted model + adjustment for mammogram screening and physical checkups | 0.96 (0.90, 1.03) | 1.01 (0.95, 1.07) | 0.97 (0.92, 1.03) |
| <b>Health Professionals Follow-Up study</b>                                             |                   |                   |                   |
| Cases/person-years                                                                      | 1,772/371,322     | 1,772/371,322     | 1,772/371,322     |
| Multivariable-adjusted model                                                            | 0.89 (0.81, 0.97) | 0.93 (0.85, 1.00) | 1.00 (0.92, 1.08) |
| Multivariable-adjusted model + adjustment for physical checkups                         | 0.89 (0.81, 0.97) | 0.93 (0.85, 1.00) | 1.00 (0.92, 1.08) |

Abbreviations: CI, confidence interval; CVD, cardiovascular disease; PDI, plant-based diet index; hPDI, healthful plant-based diet index; uPDI, unhealthful plant-based diet index. The multivariable-adjusted model was adjusted for age, race, family history of myocardial infarction, diabetes, or cancer, aspirin use, multivitamin use, initial body mass index, weight change, menopausal status and hormone use in women, smoking status, history of hypertension, hypercholesterolemia, or type 2 diabetes, antihypertensive medication use, cholesterol-lowering medication use, and initial and changes in each of smoking pack-years, physical activity, total energy intake, alcohol consumption, and margarine intake.

**Supplemental Table 6. 4-year lag analysis for 12-year changes in plant-based diet indices and risk of total mortality per 10-point increase in each index score**

|                                                  | Hazard Ratio (95% confidence interval) |                      |                                      |
|--------------------------------------------------|----------------------------------------|----------------------|--------------------------------------|
|                                                  | Pooled results                         | Nurses' Health study | Health Professionals Follow-Up Study |
| <b>Overall plant-based diet index (PDI)</b>      |                                        |                      |                                      |
| Cases/person-years                               |                                        | 9,597/524,992        | 5,711/266,821                        |
| Multivariable-adjusted model                     | 0.93 (0.91, 0.96)                      | 0.95 (0.91, 0.99)    | 0.91 (0.87, 0.96)                    |
| <b>Healthful plant-based diet index (hPDI)</b>   |                                        |                      |                                      |
| Cases/person-years                               |                                        | 9,597/524,992        | 5,711/266,821                        |
| Multivariable-adjusted model                     | 0.91 (0.89, 0.94)                      | 0.92 (0.88, 0.95)    | 0.90 (0.86, 0.94)                    |
| <b>Unhealthful plant-based diet index (uPDI)</b> |                                        |                      |                                      |
| Cases/person-years                               |                                        | 9,597/524,992        | 5,711/266,821                        |
| Multivariable-adjusted model                     | 1.09 (1.06, 1.12)                      | 1.12 (1.08, 1.16)    | 1.04 (0.99, 1.09)                    |

The multivariable-adjusted model was adjusted for age, race, family history of myocardial infarction, diabetes, or cancer, aspirin use, multivitamin use, initial body mass index, weight change, menopausal status and hormone use in women, smoking status, history of hypertension, hypercholesterolemia, or type 2 diabetes, antihypertensive medication use, cholesterol-lowering medication use, and initial and changes in each of smoking pack-years, physical activity, total energy intake, alcohol consumption, and margarine intake. Results from the Nurses' Health Study and the Health Professionals Follow-Up Study were combined with the use of the fixed effects model.

**Supplemental Table 7. 12-year changes in plant-based diet indices and risk of total mortality per 10-point increase in plant-based diet indices with excluding each food group**

|                                             | <b>Nurses' Health Study</b> | <b>Health Professionals Follow-Up Study</b> |
|---------------------------------------------|-----------------------------|---------------------------------------------|
| <b>Overall plant-based diet index (PDI)</b> |                             |                                             |
| <b>Excluded food group</b>                  |                             |                                             |
| No exclusion                                | 0.93 (0.90, 0.97)           | 0.90 (0.86, 0.94)                           |
| <b>Healthy plant foods</b>                  |                             |                                             |
| Whole grains                                | 0.95 (0.92, 0.98)           | 0.91 (0.87, 0.95)                           |
| Fruits                                      | 0.92 (0.89, 0.96)           | 0.89 (0.85, 0.93)                           |
| Vegetables                                  | 0.96 (0.93, 0.99)           | 0.90 (0.86, 0.94)                           |
| Nuts                                        | 0.95 (0.92, 0.98)           | 0.92 (0.87, 0.96)                           |
| Legumes                                     | 0.95 (0.92, 0.98)           | 0.91 (0.87, 0.96)                           |
| Vegetable oil                               | 0.96 (0.92, 0.99)           | 0.92 (0.88, 0.96)                           |
| Tea and coffee                              | 0.96 (0.93, 1.00)           | 0.91 (0.87, 0.95)                           |
| <b>Less healthy plant foods</b>             |                             |                                             |
| Fruit juices                                | 0.92 (0.89, 0.95)           | 0.89 (0.85, 0.93)                           |
| Refined grains                              | 0.94 (0.91, 0.97)           | 0.90 (0.86, 0.95)                           |
| Potatoes                                    | 0.93 (0.90, 0.97)           | 0.90 (0.86, 0.94)                           |
| Sugar-sweetened beverages                   | 0.93 (0.90, 0.96)           | 0.89 (0.85, 0.93)                           |
| Sweets and desserts                         | 0.93 (0.89, 0.96)           | 0.90 (0.86, 0.94)                           |
| <b>Animal foods</b>                         |                             |                                             |

|                                                |                   |                   |
|------------------------------------------------|-------------------|-------------------|
| Animal fat                                     | 0.94 (0.91, 0.97) | 0.90 (0.86, 0.94) |
| Dairy                                          | 0.93 (0.90, 0.96) | 0.91 (0.87, 0.95) |
| Eggs                                           | 0.93 (0.90, 0.96) | 0.91 (0.87, 0.95) |
| Fish and seafood                               | 0.92 (0.89, 0.95) | 0.89 (0.86, 0.93) |
| Meat                                           | 0.94 (0.90, 0.97) | 0.91 (0.87, 0.95) |
| Miscellaneous animal-based foods               | 0.94 (0.91, 0.97) | 0.91 (0.87, 0.95) |
| <b>Healthful plant-based diet index (hPDI)</b> |                   |                   |
| No exclusion                                   | 0.91 (0.88, 0.94) | 0.89 (0.86, 0.93) |
| <b><i>Healthy plant foods</i></b>              |                   |                   |
| Whole grains                                   | 0.93 (0.90, 0.96) | 0.91 (0.87, 0.95) |
| Fruits                                         | 0.90 (0.87, 0.93) | 0.89 (0.85, 0.93) |
| Vegetables                                     | 0.93 (0.90, 0.96) | 0.90 (0.86, 0.94) |
| Nuts                                           | 0.92 (0.89, 0.95) | 0.91 (0.87, 0.95) |
| Legumes                                        | 0.92 (0.89, 0.95) | 0.90 (0.86, 0.94) |
| Vegetable oil                                  | 0.93 (0.90, 0.96) | 0.92 (0.88, 0.96) |
| Tea and coffee                                 | 0.93 (0.90, 0.96) | 0.91 (0.87, 0.95) |
| <b><i>Less healthy plant foods</i></b>         |                   |                   |
| Fruit juices                                   | 0.92 (0.90, 0.95) | 0.91 (0.87, 0.94) |
| Refined grains                                 | 0.90 (0.87, 0.92) | 0.89 (0.85, 0.93) |
| Potatoes                                       | 0.91 (0.88, 0.93) | 0.89 (0.85, 0.93) |
| Sugar-sweetened beverages                      | 0.91 (0.89, 0.94) | 0.90 (0.86, 0.94) |



|                                                |                   |                   |
|------------------------------------------------|-------------------|-------------------|
| Sweets and desserts                            | 0.91 (0.89, 0.94) | 0.90 (0.87, 0.94) |
| <b><i>Animal foods (servings/day)</i></b>      |                   |                   |
| Animal fat                                     | 0.92 (0.89, 0.95) | 0.90 (0.86, 0.94) |
| Dairy                                          | 0.91 (0.88, 0.94) | 0.90 (0.87, 0.94) |
| Eggs                                           | 0.91 (0.88, 0.93) | 0.91 (0.87, 0.95) |
| Fish and seafood                               | 0.91 (0.88, 0.93) | 0.89 (0.86, 0.93) |
| Meat                                           | 0.91 (0.88, 0.94) | 0.91 (0.87, 0.94) |
| Miscellaneous animal-based foods               | 0.91 (0.88, 0.94) | 0.91 (0.87, 0.95) |
| <b>Unhealthy plant-based diet index (uPDI)</b> |                   |                   |
| No exclusion                                   | 1.11 (1.08, 1.15) | 1.05 (1.00, 1.09) |
| <b><i>Healthy plant foods</i></b>              |                   |                   |
| Whole grains                                   | 1.09 (1.06, 1.12) | 1.03 (0.98, 1.07) |
| Fruits                                         | 1.12 (1.08, 1.15) | 1.05 (1.00, 1.09) |
| Vegetables                                     | 1.09 (1.06, 1.13) | 1.03 (0.98, 1.07) |
| Nuts                                           | 1.10 (1.06, 1.13) | 1.02 (0.98, 1.07) |
| Legumes                                        | 1.10 (1.07, 1.13) | 1.02 (0.98, 1.07) |
| Vegetable oil                                  | 1.08 (1.05, 1.12) | 1.01 (0.97, 1.06) |
| Tea and coffee                                 | 1.08 (1.05, 1.11) | 1.02 (0.98, 1.07) |
| <b><i>Less healthy plant foods</i></b>         |                   |                   |
| Fruit juices                                   | 1.10 (1.06, 1.13) | 1.04 (0.99, 1.08) |
| Refined grains                                 | 1.12 (1.09, 1.15) | 1.06 (1.02, 1.11) |

|                                           |                   |                   |
|-------------------------------------------|-------------------|-------------------|
| Potatoes                                  | 1.11 (1.08, 1.14) | 1.05 (1.01, 1.09) |
| Sugar-sweetened beverages                 | 1.11 (1.07, 1.14) | 1.03 (0.99, 1.08) |
| Sweets and desserts                       | 1.10 (1.07, 1.13) | 1.03 (0.99, 1.08) |
| <b><i>Animal foods (servings/day)</i></b> |                   |                   |
| Animal fat                                | 1.11 (1.07, 1.14) | 1.05 (1.01, 1.09) |
| Dairy                                     | 1.10 (1.07, 1.14) | 1.05 (1.01, 1.10) |
| Eggs                                      | 1.11 (1.07, 1.14) | 1.07 (1.02, 1.11) |
| Fish and seafood                          | 1.09 (1.06, 1.13) | 1.04 (0.99, 1.08) |
| Meat                                      | 1.11 (1.08, 1.14) | 1.05 (1.00, 1.09) |
| Miscellaneous animal-based foods          | 1.11 (1.08, 1.15) | 1.05 (1.01, 1.10) |

Abbreviation: CI, confidence interval. The values are hazard ratios calculated with multivariable adjustment for age, race, family history of myocardial infarction, diabetes, or cancer, aspirin use, multivitamin use, initial body mass index, weight change, menopausal status and hormone use in women, smoking status, history of hypertension, hypercholesterolemia, or type 2 diabetes, antihypertensive medication use, cholesterol-lowering medication use, and initial and changes in each of smoking pack-years, physical activity, total energy intake, alcohol consumption, margarine intake, and corresponding excluded food intakes.

**Supplemental Table 8. 12-year changes in plant-based diet indices and risk of total mortality per 10-point increase in healthy plant-based diet score with positive coding for fish, poultry, fermented dairy, low-fat dairy, high-fat dairy, and egg**

|                                                                               | <b>Hazard Ratio (95% confidence interval)</b> |                             |                                             |
|-------------------------------------------------------------------------------|-----------------------------------------------|-----------------------------|---------------------------------------------|
|                                                                               | <b>Pooled results</b>                         | <b>Nurses' Health study</b> | <b>Health Professionals Follow-Up Study</b> |
| <b>Healthy plant-based diet index</b>                                         | 0.90 (0.88, 0.93)                             | 0.91 (0.88, 0.94)           | 0.89 (0.86, 0.93)                           |
| <b>Positive coding for fish</b>                                               | 0.89 (0.86, 0.91)                             | 0.89 (0.86, 0.92)           | 0.88 (0.85, 0.92)                           |
| <b>Positive coding for poultry</b>                                            | 0.90 (0.87, 0.92)                             | 0.90 (0.87, 0.93)           | 0.89 (0.85, 0.93)                           |
| <b>Positive coding for fermented dairy</b>                                    | 0.90 (0.88, 0.93)                             | 0.91 (0.88, 0.94)           | 0.90 (0.86, 0.94)                           |
| <b>Positive coding for low-fat dairy</b>                                      | 0.91 (0.88, 0.93)                             | 0.91 (0.88, 0.94)           | 0.90 (0.87, 0.94)                           |
| <b>Positive coding for high-fat dairy</b>                                     | 0.91 (0.89, 0.94)                             | 0.92 (0.89, 0.95)           | 0.90 (0.86, 0.95)                           |
| <b>Positive coding for egg</b>                                                | 0.90 (0.88, 0.93)                             | 0.90 (0.87, 0.93)           | 0.91 (0.87, 0.95)                           |
| <b>Positive coding for fish, poultry, fermented or low-fat dairy, and egg</b> | 0.89 (0.86, 0.91)                             | 0.88 (0.85, 0.91)           | 0.90 (0.86, 0.94)                           |

The values are hazard ratios calculated with multivariable adjustment for age, race, family history of myocardial infarction, diabetes, or cancer, aspirin use, multivitamin use, initial body mass index, weight change, menopausal status and hormone use in women, smoking status, history of hypertension, hypercholesterolemia, or type 2 diabetes, antihypertensive medication use, cholesterol-lowering medication use, and initial and changes in each of smoking pack-years, physical activity, total energy intake, alcohol consumption, and margarine intake. Results from the Nurses' Health Study and the Health Professionals Follow-Up Study were combined with the use of the fixed effects model.
